# Supplementary material for: High Compliance to Mediterranean Diet Associates with Lower Platelet Activation and Liver Collagen Deposition in Patients with Nonalcoholic Fatty Liver Disease
Source: MDPI journal article supplement (doi:10.3390/nu14061209), 2022-03-12
Supplement: s1 [file s1]

Table S1. Antiplatelet drug use according to Med-Diet-Adherence.

|                        | Adherence to Mediterranean Diet  |                                            |                                    | $p_{\text{among all}}$ | $p_{\text{low vs high}}$ |
|------------------------|----------------------------------|--------------------------------------------|------------------------------------|------------------------|--------------------------|
|                        | Low<br>(Score 0-2 pts)<br>(n=67) | Intermediate<br>(Score 3-6 pts)<br>(n=487) | High<br>(Score 7-9 pts)<br>(n=101) |                        |                          |
| <b>Aspirin (%)</b>     | 19.4                             | 14.0                                       | 11.9                               | 0.376                  | 0.191                    |
| <b>Clopidogrel (%)</b> | 1.5                              | 1.2                                        | 0                                  | 0.515                  | 0.399                    |
| <b>Ticlopidine (%)</b> | 1.5                              | 1.0                                        | 0                                  | 0.537                  | 0.399                    |

Table S2. Mean  $\text{TxB}_2$  and Pro-C3 according to aspirin, clopidogrel and ticlopidine use.

|                                              | Aspirin          |                  | $p$   | Clopidogrel      |                  | $p$   | Ticlopidine     |                  | $p$   |
|----------------------------------------------|------------------|------------------|-------|------------------|------------------|-------|-----------------|------------------|-------|
|                                              | Yes<br>(n=93)    | No<br>(n=562)    |       | Yes<br>(n=7)     | No<br>(n=648)    |       | Yes<br>(n=6)    | No<br>(n=649)    |       |
| <b><math>\text{TxB}_2</math><br/>(pg/ml)</b> | 184.0 $\pm$ 32.7 | 184.9 $\pm$ 32.0 | 0.809 | 188.9 $\pm$ 15.4 | 184.8 $\pm$ 32.2 | 0.735 | 182.9 $\pm$ 4.4 | 184.8 $\pm$ 32.2 | 0.882 |
| <b>Pro-C3<br/>(ng/ml)</b>                    | 7.2 $\pm$ 2.9    | 7.2 $\pm$ 2.6    | 0.836 | 7.6 $\pm$ 2.8    | 7.2 $\pm$ 2.6    | 0.686 | 8.7 $\pm$ 3.5   | 7.2 $\pm$ 2.6    | 0.149 |
